# Supplementary material for: Ventricular Septal Perforation after Biventricular Takotsubo Cardiomyopathy Successfully Repaired with an Amplatzer Device: First Report in the Literature
Source: Case Rep Cardiol. 2016 Apr 13;2016:3251032. doi: 10.1155/2016/3251032 (PMC4846746; doi:10.1155/2016/3251032)
Supplement: Supplementary file 1 — TEE before and after ventricular septal rupture (a and b) and after it was repaired with the Amplatzer device(c) [file 3251032.f1.zip]

Archive with 3 entries (3 files):
- Video 01.avi
- Video 02.wmv
- Video 03.wmv
